# Supplementary material for: Prospective Evaluation of the Utility of Whole Exome Sequencing in Dilated Cardiomyopathy
Source: PubMed Central journal article supplement — J Am Heart Assoc. 2020 Jan 14;9(2):e013346. doi: 10.1161/JAHA.119.013346 (PMC7033851; doi:10.1161/jaha.119.013346), 2020-01-14
Supplement: JAH3-9-e013346-s001.pdf [file JAH3-9-e013346-s001.pdf]

# **Supplemental Material**

**Table S1. Gene list.**

| <b>TIER 1 (N = 74)</b> |               | <b>TIER 2 (N = 173)</b> |                |                |                 |
|------------------------|---------------|-------------------------|----------------|----------------|-----------------|
| <i>ABCC9</i>           | <i>MAP2K1</i> | <i>NDUFA1</i>           | <i>AARS2</i>   | <i>FASTKD2</i> | <i>PCCA</i>     |
| <i>ACTC1</i>           | <i>MAP2K2</i> | <i>NDUFA11</i>          | <i>ACAD8</i>   | <i>FBXL4</i>   | <i>PCCB</i>     |
| <i>ACTN2</i>           | <i>MYBPC3</i> | <i>NDUFAB1</i>          | <i>ACAD9</i>   | <i>FHL1</i>    | <i>PDGFRA</i>   |
| <i>AKAP9</i>           | <i>MYH6</i>   | <i>NDUFAB2</i>          | <i>ACADS</i>   | <i>FHL2</i>    | <i>PGM1</i>     |
| <i>ALPK3</i>           | <i>MYH7</i>   | <i>NDUFAB3</i>          | <i>ACADVL</i>  | <i>FIG4</i>    | <i>PHYH</i>     |
| <i>ANKRD1</i>          | <i>MYL2</i>   | <i>NDUFAB4</i>          | <i>ACTA1</i>   | <i>FKRP</i>    | <i>PIGT</i>     |
| <i>BAG3</i>            | <i>MYL3</i>   | <i>NDUFAB5</i>          | <i>ADCY5</i>   | <i>FOS</i>     | <i>PMM2</i>     |
| <i>BRAF</i>            | <i>MYLK2</i>  | <i>NDUFB3</i>           | <i>AGK</i>     | <i>FOXRED1</i> | <i>PNPLA2</i>   |
| <i>CACNA2D1</i>        | <i>MYOZZ2</i> | <i>NDUFB9</i>           | <i>AGL</i>     | <i>FTO</i>     | <i>POLG</i>     |
| <i>CALR3</i>           | <i>MYPN</i>   | <i>NDUFS1</i>           | <i>AGPAT2</i>  | <i>GAA</i>     | <i>POMT1</i>    |
| <i>CAV3</i>            | <i>NEBL</i>   | <i>NDUFS2</i>           | <i>ALG1</i>    | <i>GBE1</i>    | <i>PRPS1</i>    |
| <i>CRYAB</i>           | <i>NEXN</i>   | <i>NDUFS3</i>           | <i>ARSB</i>    | <i>GLB1</i>    | <i>RAB3GAP2</i> |
| <i>CSRP3</i>           | <i>NRAS</i>   | <i>NDUFS4</i>           | <i>ATP5E</i>   | <i>GMPPB</i>   | <i>RIT1</i>     |
| <i>DES</i>             | <i>PDLIM3</i> | <i>NDUFS6</i>           | <i>ATPAF2</i>  | <i>GNAS</i>    | <i>RMRP</i>     |
| <i>DMD</i>             | <i>PKP2</i>   | <i>NDUFV1</i>           | <i>BCS1L</i>   | <i>GNPTAB</i>  | <i>SCO2</i>     |
| <i>DOLK</i>            | <i>PLN</i>    | <i>NDUFV2</i>           | <i>BOLA3</i>   | <i>GNS</i>     | <i>SDHAF1</i>   |
| <i>DTNA</i>            | <i>PRDM16</i> | <i>PEX1</i>             | <i>C10ORF2</i> | <i>GPC3</i>    | <i>SEPN1</i>    |
| <i>DSC2</i>            | <i>PRKAG2</i> | <i>PEX10</i>            | <i>CAV1</i>    | <i>GSN</i>     | <i>SGCA</i>     |
| <i>DSG2</i>            | <i>PTPN11</i> | <i>PEX11B</i>           | <i>CDKN1C</i>  | <i>GYS1</i>    | <i>SGCB</i>     |
| <i>DSP</i>             | <i>RAF1</i>   | <i>PEX12</i>            | <i>CHKB</i>    | <i>H19</i>     | <i>SLC22A5</i>  |
| <i>EMD</i>             | <i>RBM20</i>  | <i>PEX13</i>            | <i>CISD2</i>   | <i>HADH</i>    | <i>SLC25A20</i> |
| <i>EYA4</i>            | <i>RYR2</i>   | <i>PEX14</i>            | <i>COA5</i>    | <i>HADHA</i>   | <i>SLC25A3</i>  |
| <i>FKTN</i>            | <i>SCN5A</i>  | <i>PEX16</i>            | <i>COG7</i>    | <i>HADHB</i>   | <i>SLC2A10</i>  |
| <i>FLNCA</i>           | <i>SGCD</i>   | <i>PEX19</i>            | <i>COL7A1</i>  | <i>HBB</i>     | <i>SNAP29</i>   |
| <i>FXN</i>             | <i>SOS1</i>   | <i>PEX2</i>             | <i>COQ2</i>    | <i>HCCS</i>    | <i>SYNE2</i>    |
| <i>GATA4</i>           | <i>TAZ</i>    | <i>PEX26</i>            | <i>COX14</i>   | <i>IDH2</i>    | <i>TGFB1</i>    |
| <i>GATAD1</i>          | <i>TCAP</i>   | <i>PEX3</i>             | <i>COX6B1</i>  | <i>IDUA</i>    | <i>TMEM70</i>   |

|              |               |              |                |                 |               |
|--------------|---------------|--------------|----------------|-----------------|---------------|
| <i>GLA</i>   | <i>TGFB3</i>  | <i>PEX5</i>  | <i>COX7B</i>   | <i>KCNQ10T1</i> | <i>TPI1</i>   |
| <i>HRAS</i>  | <i>TMEM43</i> | <i>PEX6</i>  | <i>CPT1A</i>   | <i>LCRB</i>     | <i>TPM3</i>   |
| <i>ILK</i>   | <i>TMPO</i>   | <i>PEX7</i>  | <i>CPT2</i>    | <i>LIAS</i>     | <i>TSFM</i>   |
| <i>JPH2</i>  | <i>TNNC1</i>  | <i>HAMP</i>  | <i>D2HGDH</i>  | <i>MGME1</i>    | <i>TTPA</i>   |
| <i>JUP</i>   | <i>TNNI3</i>  | <i>HFE</i>   | <i>DLD</i>     | <i>MLYCD</i>    | <i>UBR1</i>   |
| <i>KRAS</i>  | <i>TNNT2</i>  | <i>HFE2</i>  | <i>DNAJC19</i> | <i>MUT</i>      | <i>VPS13A</i> |
| <i>LAMA4</i> | <i>TPM1</i>   | <i>MTND1</i> | <i>DPM3</i>    | <i>MYOT</i>     | <i>WFS1</i>   |
| <i>LAMP2</i> | <i>TTN</i>    | <i>MTND5</i> | <i>ELAC2</i>   | <i>NAGA</i>     | <i>XK</i>     |
| <i>LDB3</i>  | <i>TTR</i>    | <i>MTND6</i> | <i>EPG5</i>    | <i>NEU1</i>     | <i>YARS2</i>  |
| <i>LMNA</i>  | <i>VCL</i>    | <i>MTTD</i>  | <i>ERBB3</i>   | <i>NSD1</i>     |               |
|              |               |              | <i>ERCC4</i>   | <i>NUBPL</i>    |               |

**Table S2. Genes without 100% of coverage of  $\geq 20$  reads.**

| <b>Tier 1</b> | <b>Tier 2</b> |
|---------------|---------------|
| ACTC1         | NEBL          |
| BAG3          | ABCC9         |
| DES           | SOS1          |
| DMD           | HRAS          |
| DSG2          | EMD           |
| DSP           | SYNE1         |
| LAMP2         | RAF1          |
| LMNA          | ACTN2         |
| MYBPC3        | LAMA2         |
| MYH7          | DTNA          |
| RBM20         | AKAP9         |
| SCN5A         | PDLIM3        |
| TAZ           | MYH6          |
| VCL           | MYLK2         |
| TTN           | MYPN          |
| LDB3          | SDHA          |
|               | DOLK          |
|               | SYNM          |
|               | SGCD          |
|               | PKP2          |
|               | JUP           |
|               | NRAS          |
|               | CAV3          |
|               | RYR2          |
|               | TCAP          |
|               | GATA4         |
|               | JPH2          |
|               | PRDM16        |

|  |        |
|--|--------|
|  | ALPK3  |
|  | GATAD1 |

**Table S3. ACMG criteria used to guide classifying likely pathogenic and pathogenic variants.**

| Subject, gene variant                         | Classification | Variant information                                                                                                                                                                                                                                                                                                          | ACMG criteria                                                                                                                                                                                                                                                                                                                                                                                                                                                                                                                                                                                                                                                                                                                                                                                         |
|-----------------------------------------------|----------------|------------------------------------------------------------------------------------------------------------------------------------------------------------------------------------------------------------------------------------------------------------------------------------------------------------------------------|-------------------------------------------------------------------------------------------------------------------------------------------------------------------------------------------------------------------------------------------------------------------------------------------------------------------------------------------------------------------------------------------------------------------------------------------------------------------------------------------------------------------------------------------------------------------------------------------------------------------------------------------------------------------------------------------------------------------------------------------------------------------------------------------------------|
| 2,<br>NM_001001432.2( <i>TNNT2</i> ):c.517C>T | P              | Heterozygous missense<br>major aa change, very high conservation<br>in silico - consistently pathogenic<br>Absent in population databases<br>Previously described as P/LP in multiple cases with cardiomyopathy<br>Shown to segregate with disease in multiple families<br>Functional studies show abnormal protein function | <p><b>PS3</b> Well-established in vitro or in vivo functional studies supportive of a damaging effect on the gene or gene product</p> <p><b>PM2</b> Absent from controls (or at extremely low frequency if recessive) (table 6) in Exome Sequencing Project, 1000 Genomes Project, or Exome Aggregation Consortium</p> <p><b>PP3</b> Multiple lines of computational evidence support a deleterious effect on the gene or gene product (conservation, evolutionary, splicing impact, etc.)</p> <p><b>PP1</b> Cosegregation with disease in multiple affected family members in a gene definitively known to cause the disease</p> <p><b>PP5</b> Reputable source recently reports variant as pathogenic, but the evidence is not available to the laboratory to perform an independent evaluation</p> |
| 4,<br>NM_003319.4( <i>TTN</i> ):c.69855dupA   | LP             | heterozygous duplication<br>NMD predicted<br>absent in population<br>numerous TV in region associated with DCM<br>classified - LP                                                                                                                                                                                            | <p><b>PVS1</b> null variant (nonsense, frameshift, canonical <math>\pm 1</math> or 2 splice sites, initiation codon, single or multiexon deletion) in a gene where LOF is a known mechanism of disease</p> <p><b>PM2</b> Absent from controls (or at extremely low frequency if recessive) in Exome Sequencing Project, 1000 Genomes Project, or Exome Aggregation Consortium</p>                                                                                                                                                                                                                                                                                                                                                                                                                     |

|                                                   |           |                                                                                                                                                                     |                                                                                                                                                                                                                                                                                                                                                                                                                                                                                                                |
|---------------------------------------------------|-----------|---------------------------------------------------------------------------------------------------------------------------------------------------------------------|----------------------------------------------------------------------------------------------------------------------------------------------------------------------------------------------------------------------------------------------------------------------------------------------------------------------------------------------------------------------------------------------------------------------------------------------------------------------------------------------------------------|
| <p>6,<br/>NM_003319.4(TTN):c.21991G&gt;T</p>      | <p>LP</p> | <p>Heterozygous nonsense - NMD predicted absent in population databases<br/>Segregates with disease within family<br/>Classified - LP</p>                           | <p><b>PVS1</b> null variant (nonsense, frameshift, canonical <math>\pm 1</math> or 2 splice sites, initiation codon, single or multiexon deletion) in a gene where LOF is a known mechanism of disease<br/><b>PM2</b> Absent from controls (or at extremely low frequency if recessive) in Exome Sequencing Project, 1000 Genomes Project, or Exome Aggregation Consortium<br/><b>PP1</b> Cosegregation with disease in multiple affected family members in a gene definitively known to cause the disease</p> |
| <p>8,<br/>NM_003319.4(TTN):c.44430_44449del</p>   | <p>LP</p> | <p>heterozygous deletion<br/>NMD predicted absent in population databases</p>                                                                                       | <p><b>PVS1</b> null variant (nonsense, frameshift, canonical <math>\pm 1</math> or 2 splice sites, initiation codon, single or multiexon deletion) in a gene where LOF is a known mechanism of disease<br/><b>PM2</b> Absent from controls (or at extremely low frequency if recessive) in Exome Sequencing Project, 1000 Genomes Project, or Exome Aggregation Consortium<br/><b>PP1</b> Cosegregation with disease in multiple affected family members in a gene definitively known to cause the disease</p> |
| <p>9,<br/>NM_133378.4(TTN):c.10361-3042T&gt;A</p> | <p>LP</p> | <p>Heterozygous nonsense - NMD predicted<br/>Loss of substantial amount of protein<br/>absent in population databases<br/>Segregates with disease within family</p> | <p><b>PVS1</b> null variant (nonsense, frameshift, canonical <math>\pm 1</math> or 2 splice sites, initiation codon, single or multiexon deletion) in a gene where LOF is a known mechanism of disease<br/><b>PM2</b> Absent from controls (or at extremely low frequency if recessive) in Exome Sequencing Project, 1000 Genomes Project, or Exome Aggregation Consortium<br/><b>PP1</b> Cosegregation with disease in multiple affected family members in a gene definitively known to cause the disease</p> |

|                                                            |           |                                                                                                                                                                                                                                |                                                                                                                                                                                                                                                                                                                                                                                                                                                                                                                                                                                                                                                                                                                                                                              |
|------------------------------------------------------------|-----------|--------------------------------------------------------------------------------------------------------------------------------------------------------------------------------------------------------------------------------|------------------------------------------------------------------------------------------------------------------------------------------------------------------------------------------------------------------------------------------------------------------------------------------------------------------------------------------------------------------------------------------------------------------------------------------------------------------------------------------------------------------------------------------------------------------------------------------------------------------------------------------------------------------------------------------------------------------------------------------------------------------------------|
| <p>1,<br/>NM_004415.2(<i>DSP</i>):c.26<br/>38dupG</p>      | <p>LP</p> | <p>Heterozygous frameshift -<br/>predicted<br/>Absent in population<br/>databases<br/>Numerous truncating<br/>variants downstream<br/>reported as pathogenic</p>                                                               | <p><b>PVS1</b> null variant (nonsense, frameshift, canonical <math>\pm 1</math> or 2 splice sites, initiation codon, single or multiexon deletion) in a gene where LOF is a known mechanism of disease<br/><b>PM2</b> Absent from controls (or at extremely low frequency if recessive) in Exome Sequencing Project, 1000 Genomes Project, or Exome Aggregation Consortium<br/><b>PP1</b> Cosegregation with disease in multiple affected family members in a gene definitively known to cause the disease</p>                                                                                                                                                                                                                                                               |
| <p>3,<br/>NM_001035.2(<i>RYR2</i>):c.1<br/>4570T&gt;A</p>  | <p>LP</p> | <p>Heterozygous missense<br/>major aa change, very high<br/>conservation<br/>in silico consistently<br/>pathogenic<br/>absent from population<br/>database<br/>confirmed de novo<br/>Classified - LP</p>                       | <p><b>PM2</b> Absent from controls (or at extremely low frequency if recessive) (table 6) in Exome Sequencing Project, 1000 Genomes Project, or Exome Aggregation Consortium<br/><b>PP3</b> Multiple lines of computational evidence support a deleterious effect on the gene or gene product (conservation, evolutionary, splicing impact, etc.)<br/><b>PM6</b> Assumed de novo, but without confirmation of paternity and maternity</p>                                                                                                                                                                                                                                                                                                                                    |
| <p>5,<br/>NM_170707.3(<i>LMNA</i>):c.<br/>1608+1G&gt;A</p> | <p>LP</p> | <p>heterozygous splice site<br/>(cononical)<br/>Nucleotide conserved<br/>absent from population<br/>database<br/>previously reported in<br/>patient with DCM and<br/>LGMD<br/>segregation with disease<br/>classified - LP</p> | <p><b>PVS1</b> null variant (nonsense, frameshift, canonical <math>\pm 1</math> or 2 splice sites, initiation codon, single or multiexon deletion) in a gene where LOF is a known mechanism of disease<br/><b>PM2</b> Absent from controls (or at extremely low frequency if recessive) in Exome Sequencing Project, 1000 Genomes Project, or Exome Aggregation Consortium<br/><b>PP3</b> Multiple lines of computational evidence support a deleterious effect on the gene or gene product (conservation, evolutionary, splicing impact, etc.)<br/><b>PP1</b> Cosegregation with disease in multiple affected family members in a gene definitively known to cause the disease<br/><b>PP5</b> Reputable source recently reports variant as pathogenic, but the evidence</p> |



|                                         |    |                                                                                                                                                                                                                                 |                                                                                                                                                                                                                                                                                                                                                                                                                                                                                                                                                                                                                                                                                                                                                                                              |
|-----------------------------------------|----|---------------------------------------------------------------------------------------------------------------------------------------------------------------------------------------------------------------------------------|----------------------------------------------------------------------------------------------------------------------------------------------------------------------------------------------------------------------------------------------------------------------------------------------------------------------------------------------------------------------------------------------------------------------------------------------------------------------------------------------------------------------------------------------------------------------------------------------------------------------------------------------------------------------------------------------------------------------------------------------------------------------------------------------|
|                                         |    |                                                                                                                                                                                                                                 | is not available to the laboratory to perform an independent evaluation                                                                                                                                                                                                                                                                                                                                                                                                                                                                                                                                                                                                                                                                                                                      |
| 7,<br>NM_004281.3(BAG3):c.<br>108G>A    | LP | Heterozygous nonsense<br>NMD predicted<br>absent in population<br>databases<br>downstream TV reported<br>pathogenic<br>classified - LP                                                                                          | <b>PVS1</b> null variant (nonsense, frameshift, canonical $\pm 1$ or 2 splice sites, initiation codon, single or multiexon deletion) in a gene where LOF is a known mechanism of disease<br><b>PM2</b> Absent from controls (or at extremely low frequency if recessive) in Exome Sequencing Project, 1000 Genomes Project, or Exome Aggregation Consortium                                                                                                                                                                                                                                                                                                                                                                                                                                  |
| 10,<br>NM_005159.4(ACTC1):c.<br>.998C>T | LP | ACTC1<br>Heterozygous missense<br>in silico consistently<br>pathogenic<br>absent in population<br>databases<br>previously described as<br>pathogenic in a patient<br>with HCM<br>alternative change<br>classified as pathogenic | <b>PM2</b> Absent from controls (or at extremely low frequency if recessive) (table 6) in Exome Sequencing Project, 1000 Genomes Project, or Exome Aggregation Consortium<br><b>PP1</b> Cosegregation with disease in multiple affected family members in a gene definitively known to cause the disease<br><b>PP3</b> Multiple lines of computational evidence support a deleterious effect on the gene or gene product (conservation, evolutionary, splicing impact, etc.)<br><b>PP5</b> Reputable source recently reports variant as pathogenic, but the evidence is not available to the laboratory to perform an independent evaluation<br><b>PM5</b> Novel missense change at an amino acid residue where a different missense change determined to be pathogenic has been seen before |

LP = Likely pathogenic, NMD = nonsense mediated decay, P = pathogenic

**Table S4. ACMG criteria used to guide classifying rare variants of unknown significance. \***

| Variant description               | Variant information                                                                                                                                                                                                                             | ACMG criteria                                                                                                                                                                                                                                                                                                                                                                                                                                                                                                                                              |
|-----------------------------------|-------------------------------------------------------------------------------------------------------------------------------------------------------------------------------------------------------------------------------------------------|------------------------------------------------------------------------------------------------------------------------------------------------------------------------------------------------------------------------------------------------------------------------------------------------------------------------------------------------------------------------------------------------------------------------------------------------------------------------------------------------------------------------------------------------------------|
| NM_000257.3(MHY7):c.2923-1G>T     | Cononical splice site variant, conserved nucleotide, absent in population, in silico tools suggest aberrant splicing                                                                                                                            | <p><b>PVS1*</b> null variant (nonsense, frameshift, canonical <math>\pm 1</math> or 2 splice sites, initiation codon, single or multiexon deletion) in a gene where LOF is a known mechanism of disease</p> <p><b>PM2</b> Absent from controls (or at extremely low frequency if recessive) in Exome Sequencing Project, 1000 Genomes Project, or Exome Aggregation Consortium</p> <p><b>PP3</b> Multiple lines of computational evidence support a deleterious effect on the gene or gene product (conservation, evolutionary, splicing impact, etc.)</p> |
| NM_001134363.1(RBM20):c.3316+1G>A | Cononical splice site variant, conserved nucleotide, absent in population, in silico tools suggest aberrant splicing                                                                                                                            | <p><b>PVS1*</b> null variant (nonsense, frameshift, canonical <math>\pm 1</math> or 2 splice sites, initiation codon, single or multiexon deletion) in a gene where LOF is a known mechanism of disease</p> <p><b>PM2</b> Absent from controls (or at extremely low frequency if recessive) in Exome Sequencing Project, 1000 Genomes Project, or Exome Aggregation Consortium</p> <p><b>PP3</b> Multiple lines of computational evidence support a deleterious effect on the gene or gene product (conservation, evolutionary, splicing impact, etc.)</p> |
| NM_020778.4(ALPK3):c.4799G>C      | Novel missense variant, very high conservation, major amino acid change (tryptophan to serine), in silico tools suggest deleterious, located in protein kinase domain. Majority of pathogenic variants result in a premature termination codon. | <p><b>PM2</b> Absent from controls (or at extremely low frequency if recessive) (table 6) in Exome Sequencing Project, 1000 Genomes Project, or Exome Aggregation Consortium</p> <p><b>PP3</b> Multiple lines of computational evidence support a deleterious effect on the gene or gene product (conservation, evolutionary, splicing impact, etc.)</p>                                                                                                                                                                                                   |

|                               |                                                                                                                                                                                                                                                               |                                                                                                                                                                                                                                                                                                                                               |
|-------------------------------|---------------------------------------------------------------------------------------------------------------------------------------------------------------------------------------------------------------------------------------------------------------|-----------------------------------------------------------------------------------------------------------------------------------------------------------------------------------------------------------------------------------------------------------------------------------------------------------------------------------------------|
| NM_000257.2(MYH7):c.5096G>A   | Rare missense variant, very high conservation, minor amino acid change (arginine to glutamine), in silico tools suggest deleterious                                                                                                                           | <b>PP3</b> Multiple lines of computational evidence support a deleterious effect on the gene or gene product (conservation, evolutionary, splicing impact, etc.)                                                                                                                                                                              |
| NM_000256.3(MYBPC3):c.3613C>T | Rare missense variant, moderate conservation, major amino acid change (arginine to tryptophan), in silico tools suggest deleterious, located in Ig domain, previously reported in a patient with HCM                                                          | <b>PP3</b> Multiple lines of computational evidence support a deleterious effect on the gene or gene product (conservation, evolutionary, splicing impact, etc.)<br><b>PP5</b> Reputable source recently reports variant as pathogenic, but the evidence is not available to the laboratory to perform an independent evaluation              |
| NM_000257.2(MYH7):c.5287G>A   | Rare missense variant, very high conservation, minor amino acid change (alanine to threonine), in silico tools suggest deleterious, located myosin tail domain, previously reported in patients with cardiomyopathy                                           | <b>PP3</b> Multiple lines of computational evidence support a deleterious effect on the gene or gene product (conservation, evolutionary, splicing impact, etc.)<br><b>PP5</b> Reputable source recently reports variant as pathogenic, but the evidence is not available to the laboratory to perform an independent evaluation              |
| NM_001035.2(RYR2):c.10046C>T  | Novel missense variant, high conservation, major amino acid change (serine to leucine), in silico tools suggest deleterious, conflicting reports of pathogenicity                                                                                             | <b>PM2</b> Absent from controls (or at extremely low frequency if recessive) (table 6) in Exome Sequencing Project, 1000 Genomes Project, or Exome Aggregation Consortium<br><b>PP3</b> Multiple lines of computational evidence support a deleterious effect on the gene or gene product (conservation, evolutionary, splicing impact, etc.) |
| NM_000257.3(MYH7):c.3035C>A   | Rare missense variant, moderate conservation, major amino acid change (alanine to aspartic acid), in silico tools suggest deleterious, previously reported as a VUS in patients with hypertrophic cardiomyopathy, left ventricular noncompaction and myopathy | <b>PP3</b> Multiple lines of computational evidence support a deleterious effect on the gene or gene product (conservation, evolutionary, splicing impact, etc.)                                                                                                                                                                              |

|                                            |                                                                                                                                                                                                                                   |                                                                                                                                                                                                                                                                                                                                                                                                                                                                                                               |
|--------------------------------------------|-----------------------------------------------------------------------------------------------------------------------------------------------------------------------------------------------------------------------------------|---------------------------------------------------------------------------------------------------------------------------------------------------------------------------------------------------------------------------------------------------------------------------------------------------------------------------------------------------------------------------------------------------------------------------------------------------------------------------------------------------------------|
| NM_001943.4(DSG2):c.3039C>A                | Rare nonsense variant, predicted to truncate the protein, previously reported as likely pathogenic, other truncating variants downstream reported in patients with ARVC                                                           | <b>PVS1*</b> null variant (nonsense, frameshift, canonical $\pm 1$ or 2 splice sites, initiation codon, single or multiexon deletion) in a gene where LOF is a known mechanism of disease<br><b>PP5</b> Reputable source recently reports variant as pathogenic, but the evidence is not available to the laboratory to perform an independent evaluation                                                                                                                                                     |
| NM_000256.3(MYBPC3):c.604A>C (p.Lys202Gln) | Rare missense variant, very high conservation, minor amino acid change (lysine to glutamine), in silico tools suggest deleterious, located in an Ig domain, previously reported with conflicting interpretations of pathogenicity | <b>PP3</b> Multiple lines of computational evidence support a deleterious effect on the gene or gene product (conservation, evolutionary, splicing impact, etc.)                                                                                                                                                                                                                                                                                                                                              |
| NM_000257.3(MYH7):c.1791C>A (p.Asn597Lys)  | Novel missense variant, very high conservation, moderate amino acid change (asparagine to lysine), in silico tools suggest deleterious, previously described in a patient with DCM and another with LVNC                          | <b>PM2</b> Absent from controls (or at extremely low frequency if recessive) (table 6) in Exome Sequencing Project, 1000 Genomes Project, or Exome Aggregation Consortium<br><b>PP3</b> Multiple lines of computational evidence support a deleterious effect on the gene or gene product (conservation, evolutionary, splicing impact, etc.)<br><b>PP5</b> Reputable source recently reports variant as pathogenic, but the evidence is not available to the laboratory to perform an independent evaluation |
| NM_000256.3(MYBPC3):c.1334C>T              | Rare missense variant, high conservation, moderate amino acid change (threonine to methionine), in silico tools suggest deleterious, situated in an Ig domain                                                                     | <b>PP3</b> Multiple lines of computational evidence support a deleterious effect on the gene or gene product (conservation, evolutionary, splicing impact, etc.)                                                                                                                                                                                                                                                                                                                                              |
| NM_001458.4(FLNC):c.3125A>G                | Rare missense variant, very high conservation, major amino acid change (tyrosine to cysteine),                                                                                                                                    | <b>PP3</b> Multiple lines of computational evidence support a deleterious effect on the gene or gene product (conservation, evolutionary, splicing impact, etc.)                                                                                                                                                                                                                                                                                                                                              |

|                                |                                                                                                                                                                |                                                                                                                                                                                                                                                                                                                                                              |
|--------------------------------|----------------------------------------------------------------------------------------------------------------------------------------------------------------|--------------------------------------------------------------------------------------------------------------------------------------------------------------------------------------------------------------------------------------------------------------------------------------------------------------------------------------------------------------|
|                                | in silico tools suggest deleterious, situated in a Filamin repeat domain                                                                                       |                                                                                                                                                                                                                                                                                                                                                              |
| (NM_00494.3(DSC2):c.2125+1G>T) | Cononical splice site variant, conserved nucleotide, absent in population, in silico tools conflicting                                                         | <b>PVS1*</b> null variant (nonsense, frameshift, canonical $\pm 1$ or 2 splice sites, initiation codon, single or multiexon deletion) in a gene where LOF is a known mechanism of disease<br><b>PM2</b> Absent from controls (or at extremely low frequency if recessive) in Exome Sequencing Project, 1000 Genomes Project, or Exome Aggregation Consortium |
| NM_007078.2(LDB3):c.1675C>T    | Rare missense variant, high conservation, major amino acid change (arginine to tryptophan), in silico tools suggest deleterious, situated in a LIM-Zinc domain | <b>PP3</b> Multiple lines of computational evidence support a deleterious effect on the gene or gene product (conservation, evolutionary, splicing impact, etc.)                                                                                                                                                                                             |

\* Expert team consensus sought to adjust the appropriate strength level of PVS1 by addressing issues specific to each variant type (duplication, deletion, splice site, nonsense/frameshift, initiation codon) as well as recommendations for determining if loss of function is a disease mechanism for the gene of interest.

**Table S5. List of genes with pathogenic or likely pathogenic variants and coverage by commercially available gene panels in Victoria, Australia (October 2018).**

| <b>Gene</b>  | <b>Number</b> | <b>Included on dilated cardiomyopathy panel</b> | <b>Included on cardiomyopathy full panel</b> | <b>Included on comprehensive cardiac panel</b> |
|--------------|---------------|-------------------------------------------------|----------------------------------------------|------------------------------------------------|
| <i>DSP</i>   | 1             | N                                               | Y                                            | Y                                              |
| <i>TNNT2</i> | 1             | Y                                               | Y                                            | Y                                              |
| <i>TTN</i>   | 3             | Y                                               | Y                                            | Y                                              |
| <i>LMNA</i>  | 1             | Y                                               | Y                                            | Y                                              |
| <i>BAG3</i>  | 1             | Y                                               | Y                                            | Y                                              |
| <i>RYR2</i>  | 1             | N                                               | Y                                            | Y                                              |
| <i>ACTC1</i> | 1             | Y                                               | Y                                            | Y                                              |

*Y = Yes, N = Not covered*
